# Supplementary material for: Comparison of the composition and function of the gut microbiome in herdsmen from two pasture regions, Hongyuan and Xilingol
Source: PubMed Central journal article supplement (PMC8194741; doi:10.1002/fsn3.2290), 2021-05-04

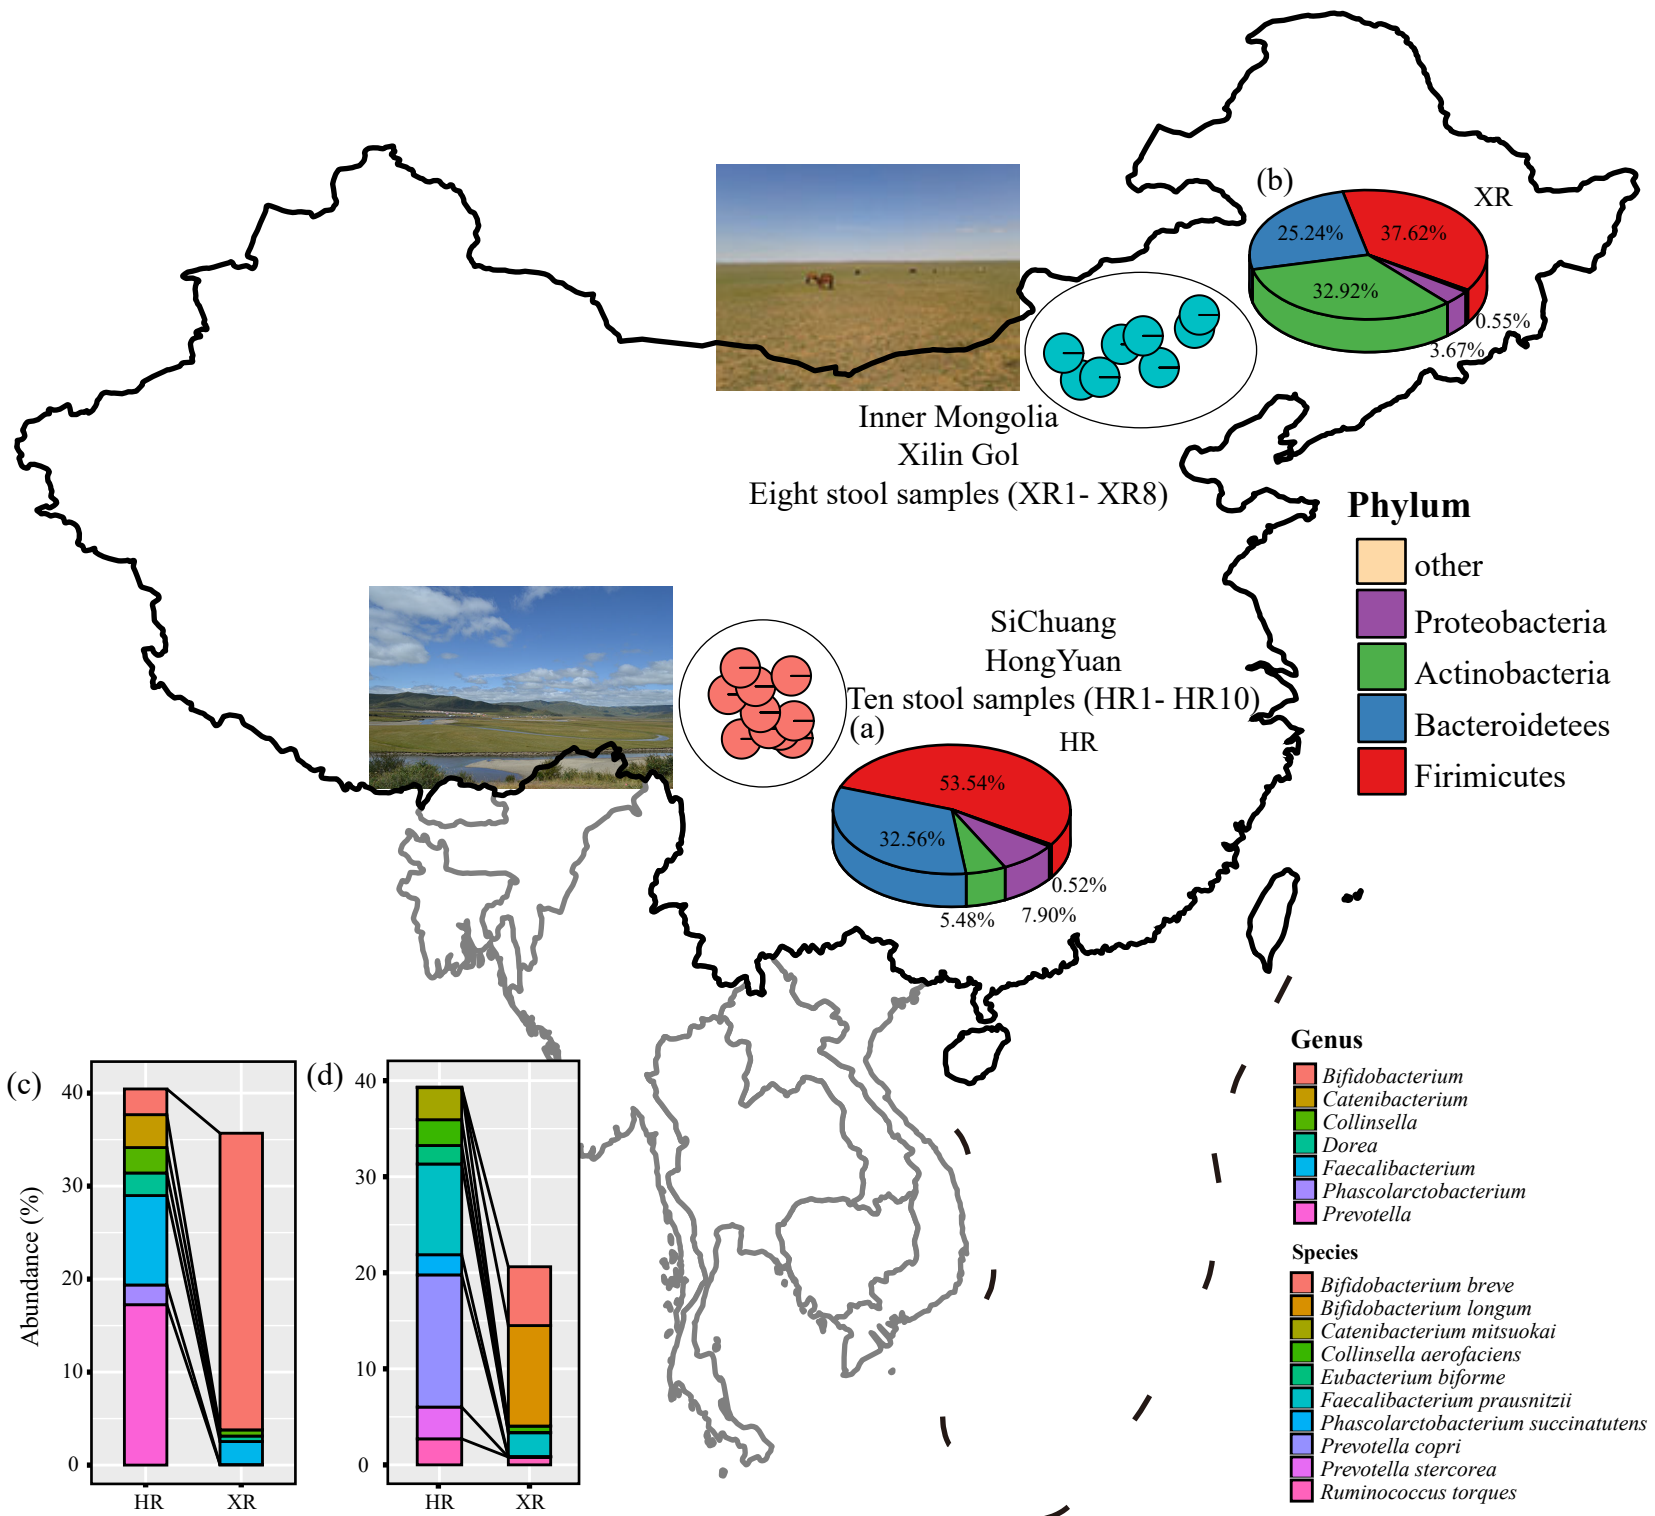

Supplement: FSN3-9-3258-s001.pdf [file FSN3-9-3258-s001.pdf]
